# Supplementary material for: Diel CO2 cycles reduce severity of behavioural abnormalities in coral reef fish under ocean acidification
Source: PubMed Central journal article supplement (PMC5578974; doi:10.1038/s41598-017-10378-y), 2017-08-31
Supplement: 41598_2017_10378_MOESM1_ESM.pdf [file 41598_2017_10378_MOESM1_ESM.pdf]

## Supplementary Information

### Diel CO<sub>2</sub> cycles reduce severity of behavioural abnormalities in coral reef fish under ocean acidification

Michael D. Jarrold<sup>1,2,\*</sup>, Craig Humphrey<sup>3</sup>, Mark I. McCormick<sup>1,2</sup>, Philip L. Munday<sup>2</sup>

<sup>1</sup> College of Science and Engineering, James Cook University, Townsville, QLD 4811, Australia.

<sup>2</sup> ARC Centre of Excellence for Coral Reef Studies, James Cook University, Townsville, QLD 4811, Australia.

<sup>3</sup> National Sea Simulator, Australian Institute of Marine Science, PMB 3, Townsville, Queensland 4810, Australia.

\*Corresponding author:

Michael D. Jarrold

College of Science and Engineering, James Cook University, Townsville, QLD 4811, Australia.

Email address: [michael.jarrold@my.jcu.edu.au](mailto:michael.jarrold@my.jcu.edu.au)

### Experimental systems and CO<sub>2</sub> manipulation

#### *Experiment one*

The experimental system used at JCU was an 11,000 L re-circulating system. Briefly, the system consisted of a large external 3,700 L sump tank connected to a bio-filter, protein skimmer, UV steriliser and a 1000 L algal bio-remediation tank. The external sump supplied water to four separate 1,600 L re-circulating systems (one *per* pCO<sub>2</sub> treatment) made up from one 1000 L sump tank and fifteen 40 L holding tanks, contained within a temperature controlled room. Water was supplied at a rate of approximately 1,600 L *per* day allowing for a complete exchange with the external sump. Holding tanks were supplied with water at a rate of 1 L min<sup>-1</sup>. Both the internal sumps and holding tanks were aerated with ambient air.

Elevated  $p\text{CO}_2$  treatments were achieved by dosing the 1000 L internal sumps with  $\text{CO}_2$ . This was controlled by solenoid valves (M-Ventil Standard, Aqua Medic, Germany) connected to a pH control system (Aqua Medic AT Control System, Aqua Medic, Germany) with laboratory grade pH electrodes (Neptune Systems, USA). The Aqua Medic AT Control System has a curve function which allowed us to create fluctuating  $p\text{CO}_2$  profiles. pH profiles in the fluctuating  $p\text{CO}_2$  treatments were recorded every other day using a pH meter (InLab Expert Pro electrode and Seven2Go Pro meter, Mettler Toledo, Switzerland) set to take a reading every 15 min. For the stable  $p\text{CO}_2$  treatments  $\text{pH}_{\text{NBS}}$  was measured twice daily using the same model of pH meter. Seawater pH on the total hydrogen ion concentration scale (total scale,  $\text{pH}_{\text{T}}$ ) was measured each week with a spectrophotometer following standard operating procedures<sup>1</sup> using the indicator dye meta/*m*-cresol purple (mCP) (*m*-cresol purple sodium salt 99%, non-purified, Acros Organic). Daily and fluctuating  $\text{pH}_{\text{NBS}}$  measurements were converted to  $\text{pH}_{\text{T}}$  based on the offset between weekly  $\text{pH}_{\text{T}}$  and  $\text{pH}_{\text{NBS}}$  measurements. Temperature was recorded daily with a digital thermometer (Comark C26, Norfolk, UK). Salinity readings were taken weekly using a conductivity sensor (HQ15d; Hach, USA). Total alkalinity was also measured weekly using Gran Titration (Metrohm 888 Titrando Titrator Metrohm AG, Switzerland) and certified reference material from Dr. A. G. Dickson (Scripps Institution of Oceanography). All seawater parameters were measured in randomly chosen holding tanks.  $p\text{CO}_2$  values were calculated as a function of  $\text{pH}_{\text{T}}$ , temperature and salinity using  $\text{CO}_2\text{SYS}$ <sup>2</sup> employing constants from<sup>3</sup> refit by<sup>4</sup> and the  $\text{KHSO}_4$  dissociation constant from<sup>5</sup>. Mean values for each of these seawater parameters are presented in Table 1.

### *Experiment two*

The experimental system used at SeaSim was a flow-through system which comprised of multiple independent lines (duplicate independent lines per  $p\text{CO}_2$  treatment). The system used ultra-filtered seawater (0.04  $\mu\text{m}$ ), temperature controlled to 28.5°C. Each seawater line supplied three custom made 50 L tanks at the rate of 50 L  $\text{h}^{-1}$ . The experimental tanks were placed in individual temperature-controlled water baths to ensure temperature stability ( $\pm 0.1^\circ\text{C}$ ). Treatments and tank replicates were randomly positioned in the experimental room.

The management of  $p\text{CO}_2$  and temperature was achieved through the design and implementation of a custom Model Predictive Control logic running on a micro-PLC (Series S7-1500, Siemens, Australia). The micro-PLC was integrated with the general SeaSim control system, to provide SCADA (Siemens WinCC) accessibility and data archiving. The  $p\text{CO}_2$  feedback for each of the replication lines was provided via non-dispersive infrared measurements<sup>1</sup>. Tank water was delivered to the equilibrator (Seasim, AIMS design, custom built) by an in-tank submersible pump (Universal Pump 1260, EHEIM, Deizisau, Germany) where the  $p\text{CO}_2$  of the air in the chamber reaches and maintains equilibrium with the  $p\text{CO}_2$  of the experimental water. The air was constantly delivered to a NDIR  $\text{CO}_2$  analyser (Telaire T6613, Amphenol, Australia) that provided live feedback to the PLC. The  $\text{CO}_2$  analysers were calibrated monthly using certified calibration gas mixtures at 0, 600 and 2000 ppm. The control system delivered  $\text{CO}_2$  through Gas Mass Flow Controllers (GFC17 series, Aalborg, Orangeburg, USA) according to the profiling schedule designed for the  $p\text{CO}_2$  treatment and the feedback signal coming from the experimental tanks.  $\text{CO}_2$  was dissolved in the flow-through water by means of membrane contactors (Membrana Liqui-Cel 2.5x8 Extra-Flow, 3M, USA). Total alkalinity was also measured weekly as described above. Mean values for seawater parameters are presented in Table 2.

Throughout the experiment incoming coastal water had a  $p\text{CO}_2$  ranging between 500-550  $\mu\text{atm}$ . Thus, to achieve a control  $p\text{CO}_2$  level closer to 460  $\mu\text{atm}$ , membrane contactors (Membrana Liqui-Cel 4x28 Extra-Flow) were used to remove  $\text{CO}_2$ , using  $\text{CO}_2$  – depleted air as sweep gas. This was only possible for the control treatments and consequently the lower  $p\text{CO}_2$  levels in the  $750 \pm 300 \mu\text{atm}$  treatment matched the  $p\text{CO}_2$  of the incoming seawater (500-550  $\mu\text{atm}$ ).

**Figure S1. Relative lateralization ( $L_R$ ) for juvenile *Acanthochromis polyacanthus* presented with a T-maze choice chamber in experiment one.** Juvenile fish from each  $p\text{CO}_2$  treatment ( $n = 60$  per treatment) were allowed to choose to turn left or right for a total of 10 turns. Graphs show  $L_R$  with positive and negative values indicating right and left turns, respectively. The extreme values of  $|100|$  indicate fish that turned in the same direction for all 10 turns.

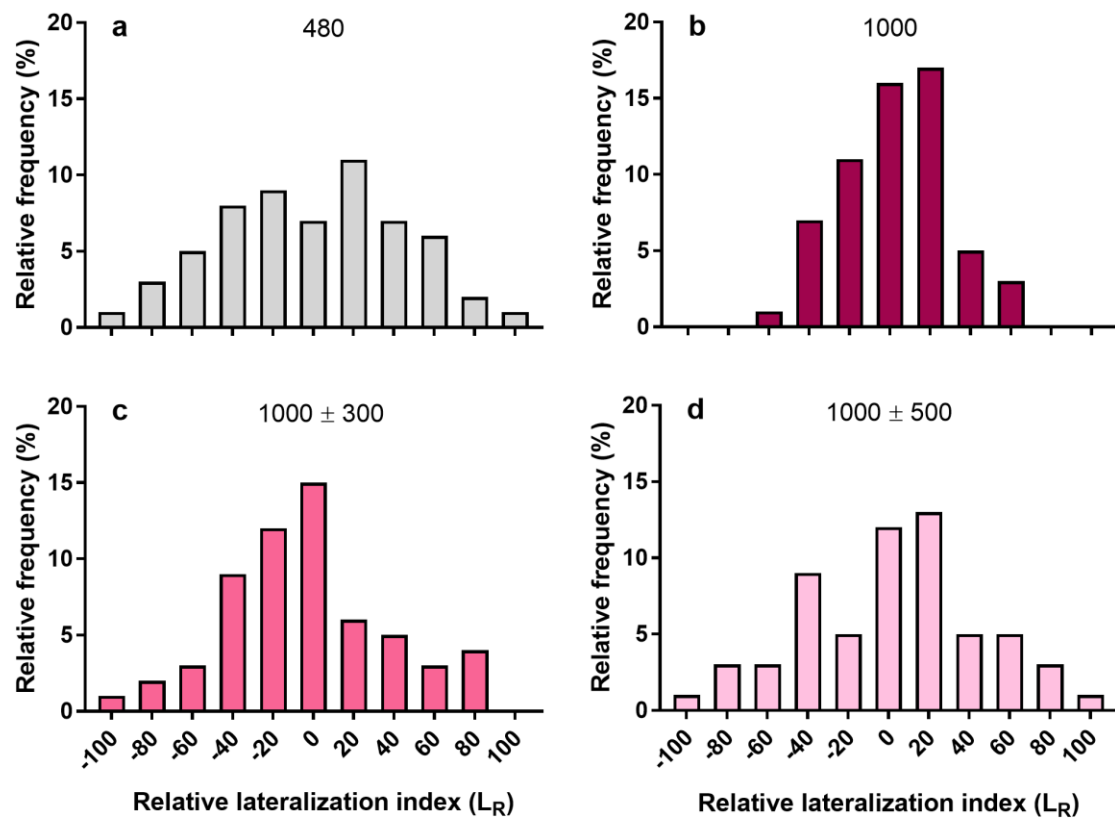

**Figure S2. Relative lateralization ( $L_R$ ) for juvenile *Acanthochromis polyacanthus* presented with a T-maze choice chamber in experiment two.** Juvenile fish from each  $p\text{CO}_2$  treatment ( $n = 60$  per treatment) were allowed to choose to turn left or right for a total of 10 turns. Graphs show  $L_R$  with positive and negative values indicating right and left turns, respectively. The extreme values of  $|100|$  indicate fish that turned in the same direction for all 10 turns.

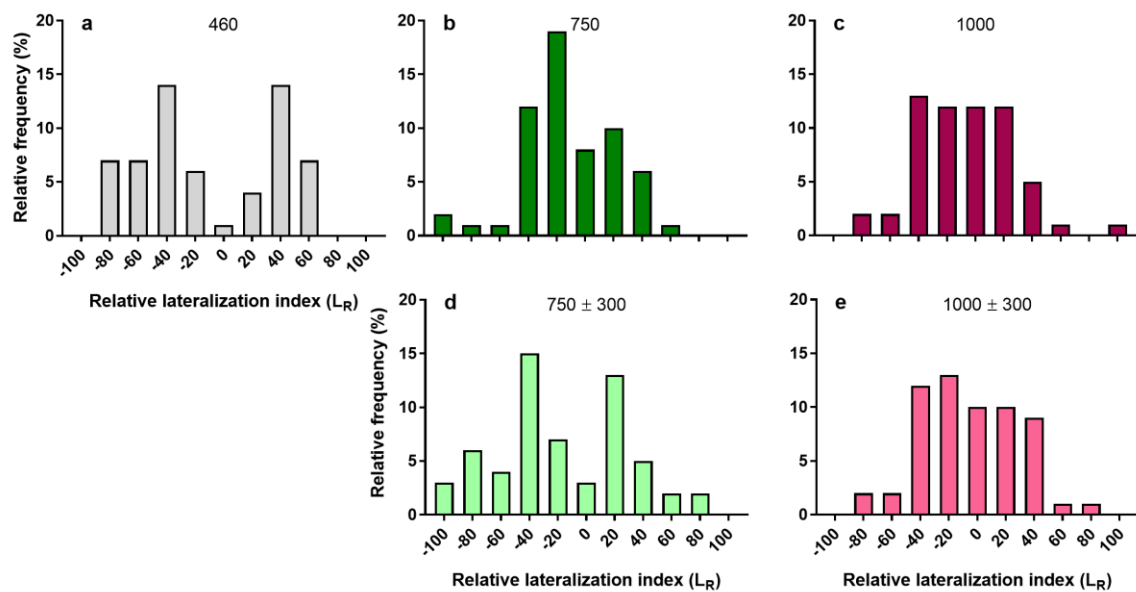

**Figure S3. Mean daily  $p\text{CO}_2$  profiles for experiment one.** Coloured sections are  $\pm 1$  SD.

Profiles for the stable  $p\text{CO}_2$  treatments were based on measurements taken twice per day. In reality some minor daily variation would have likely occurred.

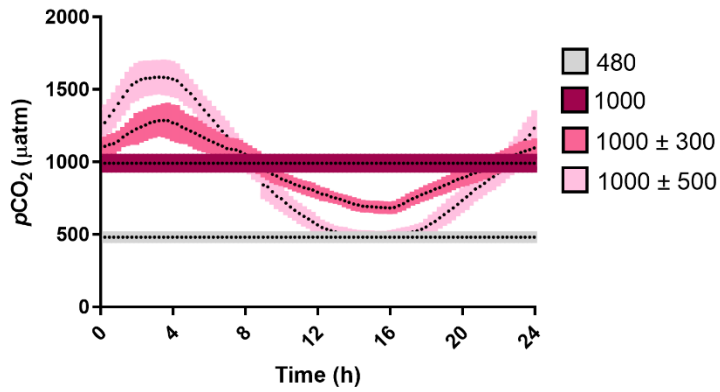

**Figure S4. Mean daily (a) stable and (b) cycling  $p\text{CO}_2$  profiles for experiment two.**

Coloured sections are  $\pm 1$  SD.

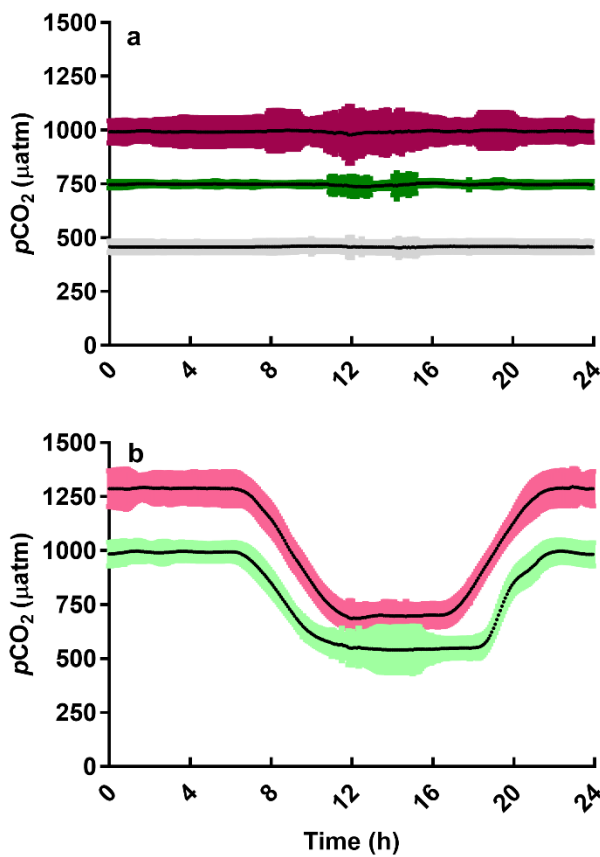

## References

1. Dickson, A., Sabine, C. L. & Christian, J. Guide to best practices for ocean CO<sub>2</sub> measurements. PICES special publication 3. IOCCP report No. 8. (2007).
2. Pierrot, D., Lewis, E. & Wallace, D. CO<sub>2</sub>SYS DOS program developed for CO<sub>2</sub> system calculations. ORNL/CDIAC-105. Carbon Dioxide Information Analysis Center, Oak Ridge National Laboratory. US Department of Energy, Oak Ridge, Tennessee. (2006).
3. Mehrbach, C., Culberson, C. H., Hawley, J. E. & Pytkowicz, R. M. Measurement of the apparent dissociation constants of carbonic acid in seawater at atmospheric pressure. *Limnol. Oceanogr.* **18**, 897–907 (1973).
4. Dickson, A. G. & Millero, F. J. A comparison of the equilibrium constants for the dissociation of carbonic acid in seawater media. *Deep Sea Res. Part A. Oceanogr. Res. Pap.* **34**, 1733–1743 (1987).
5. Dickson, A. G. Standard potential of the reaction:  $\text{AgCl(s)} + 1/2\text{H}_2(\text{g}) = \text{Ag(s)} + \text{HCl(aq)}$ , and the standard acidity constant of the ion  $\text{HSO}_4^-$  in synthetic sea water from 273.15 to 318.15 K. *J. Chem. Thermodyn.* **22**, 113–127 (1990).
